# Supplementary material for: Peroxidases identified in a subtractive cDNA library approach show tissue-specific transcript abundance and enzyme activity during seed germination of Lepidium sativum
Source: PubMed Central journal article supplement — J Exp Bot. 2009 Oct 30;61(2):491–502. doi: 10.1093/jxb/erp318 (PMC2803213; doi:10.1093/jxb/erp318), 2009-10-30

**Peroxidases identified in a subtractive cDNA library approach show tissue-specific transcript abundance and enzyme activity during seed germination of *Lepidium sativum***

**Ada Linkies, Uta Schuster-Sherpa, Stefanie Tintelnot, Gerhard Leubner-Metzger, Kerstin Müller\***

University of Freiburg, Faculty of Biology, Institute for Biology II, Botany / Plant Physiology, Schänzlestr. 1, D-79104 Freiburg, Germany, [www.seedbiology.de](http://www.seedbiology.de)

\*To whom correspondence should be addressed: Kerstin Müller, phone: +49-761-2032669, email: [kerstin.mueller@biologie.uni-freiburg.de](mailto:kerstin.mueller@biologie.uni-freiburg.de)

*Journal of Experimental Botany* 2009 (JEXBOT/2009/040063)

**Table S1.** Cress sequences of the subtractive library were deposited in the GenBank database and are available via the NCBI website ([www.ncbi.nlm.nih.gov](http://www.ncbi.nlm.nih.gov)). Putative gene function was based on the highest BLAST hit, usually Arabidopsis otherwise the closest homologue is indicated next to the percentage nucleotide identity.

| GenBank accession number | Locus of closest homologue | Putative gene product function                        | Sequence similarity to Arabidopsis (%) if not indicated otherwise |
|--------------------------|----------------------------|-------------------------------------------------------|-------------------------------------------------------------------|
| GR972444                 | AT1G01300                  | aspartyl protease family                              | 87.6                                                              |
| GR972418                 | AT1G07890                  | ascorbate peroxidase                                  | 87.6                                                              |
| GR972448                 | AT1G14290                  | acid phosphatase, SBH2 (sphingoid base hydroxylase 2) | 92.6                                                              |
| GR972432                 | AT1G32900                  | starch synthase                                       | 84.1                                                              |
| GR972464                 | AT1G64970                  | gamma-tocopherol-methyltransferase                    | 90.7 <i>Brassica napus</i>                                        |
| GR972445                 | AT1G66200                  | glutamine synthase                                    | 89.2                                                              |
| GR972417                 | AT1G75040                  | PR5                                                   | 82.2                                                              |
| GR972433                 | AT1G79050                  | DNA repair recA                                       | 87.1                                                              |
| GR972468                 | AT2G18980                  | putative peroxidase                                   | 84.3                                                              |
| GR972415                 | AT2G33150                  | KAT2 (also known as peroxisome defective 1)           | 83.7 <i>Brassica napus</i>                                        |
| GR972452                 | AT2G34040                  | API5 apoptosis inhibitory                             | 85.4                                                              |
| GR972441                 | AT2G34470                  | UREG (urease accessory protein G)                     | 89.6                                                              |
| GR972466                 | AT2G36530                  | phosphopyruvate hydratase                             | 89.6 <i>Brassica rapa</i>                                         |
| GR972424                 | AT3G12620                  | PP2C family (protein phosphatase)                     | 91.6                                                              |
| GR972456                 | AT3G13920                  | EIF4A1 (eukaryotic translation initiation factor)     | 87.5                                                              |
| GR972423                 | AT3G16640                  | TCTP (translationally controlled tumor)               | 90.9                                                              |
| GR972414                 | AT3G20820                  | leucine-rich repeat family                            | 86.4                                                              |
| GR972460                 | AT3G21720                  | isocitrate lyase                                      | 90.3                                                              |
| GR972462                 | AT3G46740                  | TOC75-III                                             | 88.2                                                              |
| GR972446                 | AT3G52960                  | Peroxiredoxin Type 2                                  | 85.9                                                              |
| GR972442                 | AT3G53500                  | nucleic acid binding                                  | 89.1                                                              |

|          |           |                                          |                                      |
|----------|-----------|------------------------------------------|--------------------------------------|
| GR972457 | AT3G55120 | TT5 (transparent testa)                  | 80.5 <i>Brassica rapa</i>            |
| GR972449 | AT3G55430 | beta-1,3-glucanase                       | 88.1                                 |
| GR972421 | AT4G02890 | UBQ14 (ubiquitin)                        | 87.6                                 |
| GR972453 | AT4G05050 | UBQ11 (ubiquitin)                        | 89.2                                 |
| GR972469 | AT4G05320 | UBQ10 (ubiquitin)                        | 88.8 <i>Boechera<br/>divaricarpa</i> |
| GR972463 | AT4G13510 | ammonium transporter                     | 82.8                                 |
| GR972436 | AT4G21150 | ribophorin II family                     | 88.7                                 |
| GR972426 | AT4G31990 | cationic amino acid transporter          | 80.8                                 |
| GR972434 | AT4G32410 | cellulose synthase                       | 86.6                                 |
| GR972425 | AT5G05750 | DNAJ                                     | 87.7                                 |
| GR972431 | AT5G09440 | phosphate-responsive                     | 87.4                                 |
| Gr972422 | AT5G13930 | chalcone synthase (TT4)                  | 81.5                                 |
| GR972427 | AT5G14030 | TRAPB family (translocon-associated)     | 89.7                                 |
| GR972440 | AT5G17920 | cobalmin-independent methionine synthase | 94.2                                 |
| GR972461 | AT5G19780 | tubulin alpha-5                          | 95.6                                 |
| GR972467 | AT5G25350 | EIN3-binding F-box protein               | 85.5                                 |
| GR972455 | AT5G37600 | glutamine synthase                       | 91.3                                 |
| GR972435 | AT5G37770 | calmodulin-related                       | 84.7                                 |
| GR972450 | AT5G48930 | anthranilate N-benzoyltransferase        | 92.3                                 |
| GR972447 | AT5G57300 | methyltransferase                        | 90.3                                 |
| GR972454 | AT5G60390 | elongation factor                        | 96.5                                 |
| GR972451 | AT5G62700 | tubulin beta-3                           | 79.5                                 |
| GR972439 | AT3G49910 | putative 60S ribosomal protein           | 89.6                                 |
| GR972419 | AT4G09800 | S18.A ribosomal protein                  | 91.5                                 |
| GR972459 | AT2G18020 | 60S ribosomal protein L2                 | 94.1                                 |

**Fig S1** . Detailed germination kinetics of fresh *Arabidopsis* seeds at 24 °C in continuous light of the three peroxidase-SALKlines and the corresponding WT. Three times 50 seeds were used per line. Means +/- SE are shown. TR = testa rupture, ER = endosperm rupture.

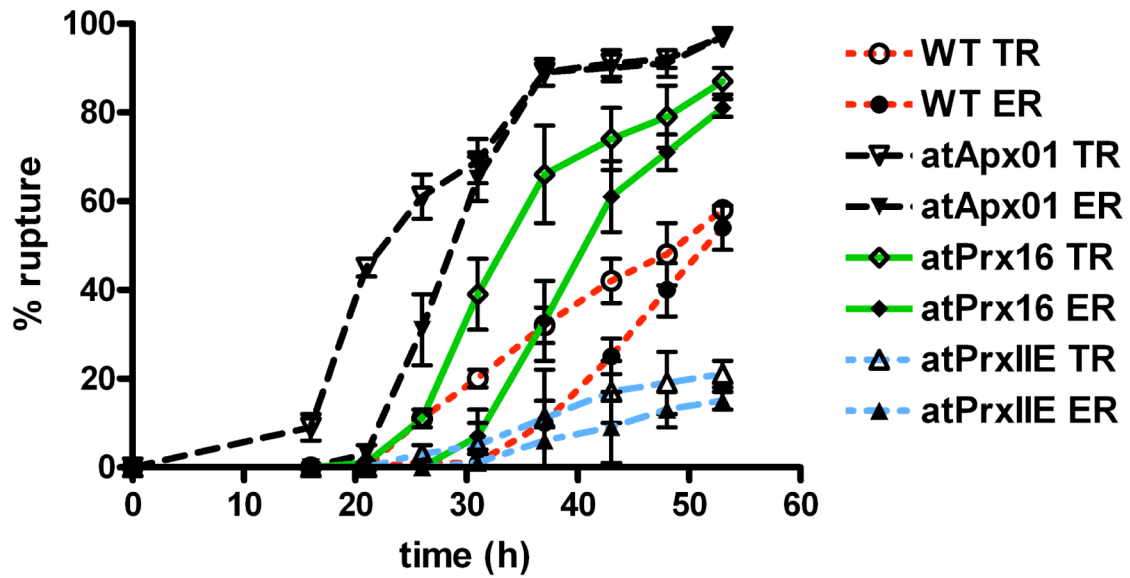

Supplement: erp318_1.pdf [file erp318_1.pdf]
